# Supplementary material for: Denitrification of Permeable Sand Sediment in a Headwater River Is Mainly Influenced by Water Chemistry, Rather Than Sediment Particle Size and Heterogeneity
Source: MDPI journal article supplement (doi:10.3390/microorganisms9112202), 2021-10-22
Supplement: s1 [file s1]

**Table S1.** The primers information used for qPCR in this study.

| Name        | Sequence (5'-3')      | Types          | PCR Products (bp) |
|-------------|-----------------------|----------------|-------------------|
| <b>nirS</b> | TTCRTCAAGACSCAYCCGAA  | Forward Primer | 331               |
|             | CGTTGAACTTRCCGGT      | Reverse Primer |                   |
| <b>nirK</b> | ATCATGGTSC TGCCGCG    | Forward Primer | 165               |
|             | GCCTCGATCAGRTTG TGGTT | Reverse Primer |                   |
| <b>nosZ</b> | CGYTGTTCMTCGACAGCCAG  | Forward Primer | 252               |
|             | CGSACCTTSTTGCCSTYGCG  | Reverse Primer |                   |

**Table S2.** Hydrodynamics and water physico-chemistry in the Qi River and the three inoculated reaches (Wang et al., 2021). Values in bold and different letters indicate significant differences ( $p < 0.05$ ).

| River and Reach                                          | River        | Reach 1                 | Reach 2                 | Reach 3                 |
|----------------------------------------------------------|--------------|-------------------------|-------------------------|-------------------------|
| <b>Temperature ( °C)</b>                                 | 15.06 ± 8.31 | 17.80 ± 7.16            | 14.23 ± 6.84            | 15.12 ± 9.03            |
| <b>Pressure (mmHg)</b>                                   |              | <b>736.73 ± 4.57 b</b>  | <b>700.2 ± 9.04a</b>    | <b>703.8 ± 7.04 a</b>   |
| <b>Turbidity (NTU)</b>                                   |              | <b>0.61 ± 0.12 ab</b>   | <b>0.34 ± 0.17 a</b>    | <b>1.33 ± 0.87 b</b>    |
| <b>Water velocity (m s<sup>-1</sup>)</b>                 |              | 0.23 ± 0.2              | 0.17 ± 0.11             | 0.29 ± 0.15             |
| <b>EC (μs cm<sup>-1</sup>)</b>                           |              | <b>409.63 ± 40.92 b</b> | <b>235.48 ± 25.89 b</b> | <b>229.13 ± 14.88 a</b> |
| <b>pH</b>                                                | 8.18 ± 0.24  | 8.54 ± 0.14             | 8.50 ± 0.17             | 8.49 ± 0.36             |
| <b>ORP (mv)</b>                                          |              | 282.2 ± 45.99           | 281.45 ± 43.67          | 283.22 ± 43.21          |
| <b>TC (mg L<sup>-1</sup>)</b>                            |              | 26.8 ± 8.65             | 24.21 ± 8.72            | 21.95 ± 5.99            |
| <b>TIC (mg L<sup>-1</sup>)</b>                           |              | 9.7 ± 12.6              | 8.87 ± 10.33            | 6.97 ± 8.03             |
| <b>TOC (mg L<sup>-1</sup>)</b>                           |              | 17.09 ± 4.19            | 15.34 ± 6.14            | 14.97 ± 7.02            |
| <b>DOC (mg L<sup>-1</sup>)</b>                           | 2.47 ± 1.27  | 13.08 ± 5.53            | 13.08 ± 8.35            | 10.90 ± 5.79            |
| <b>TN (mg L<sup>-1</sup>)</b>                            | 3.80 ± 1.45  | 1.66 ± 0.9              | 2.89 ± 0.95             | 2.47 ± 2.39             |
| <b>NH<sub>4</sub><sup>+</sup> -N (mg L<sup>-1</sup>)</b> | 0.50 ± 0.34  | 0.12 ± 0.15             | 0.08 ± 0.06             | 0.10 ± 0.12             |
| <b>NO<sub>3</sub><sup>-</sup> -N (mg L<sup>-1</sup>)</b> | 1.63 ± 0.81  | <b>0.16 ± 0.16 a</b>    | <b>1.55 ± 0.42 b</b>    | <b>0.97 ± 0.50 ab</b>   |
| <b>TP (mg L<sup>-1</sup>)</b>                            | 0.03 ± 0.02  | 0.02 ± 0.01             | 0.02 ± 0.01             | 0.03 ± 0.02             |
| <b>DO (mg L<sup>-1</sup>)</b>                            | 9.48 ± 1.59  | 11.42 ± 3.83            | 10.18 ± 2.64            | 11.12 ± 1.96            |

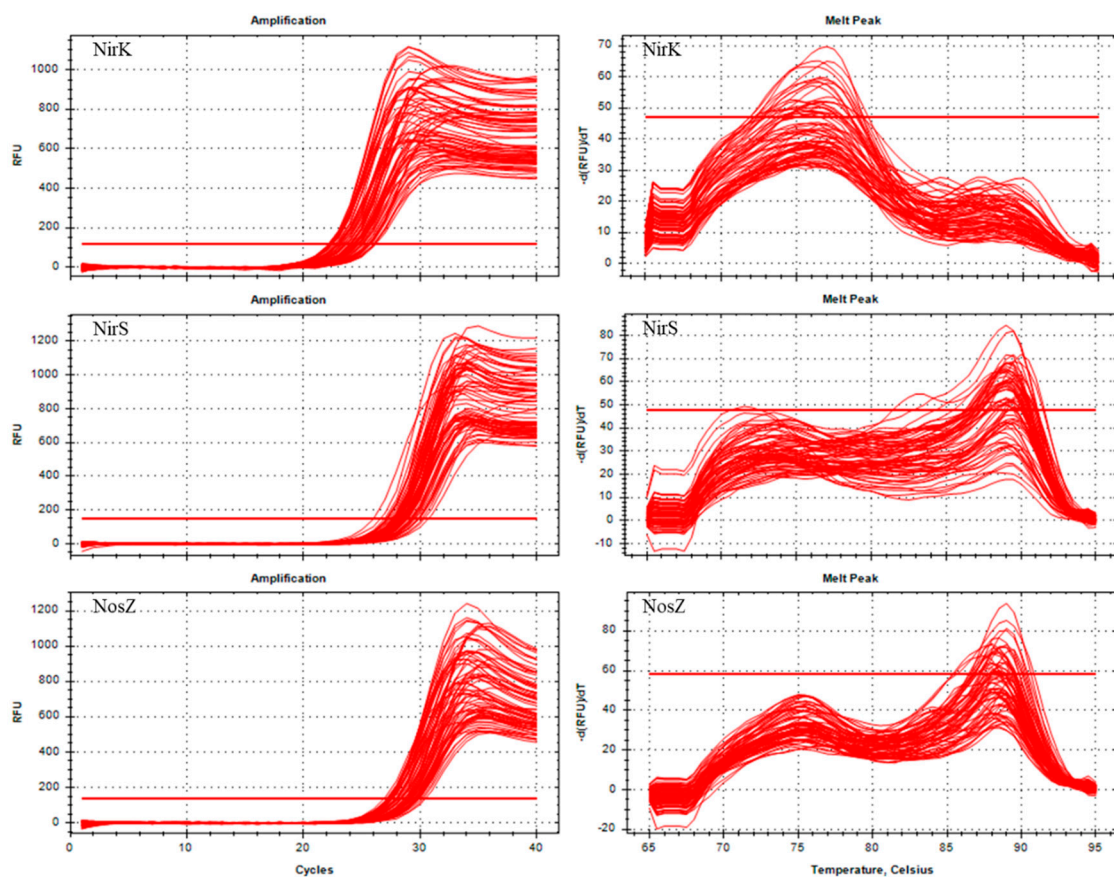

**Figure S1.** The amplification and dissociation curves of the qPCR.

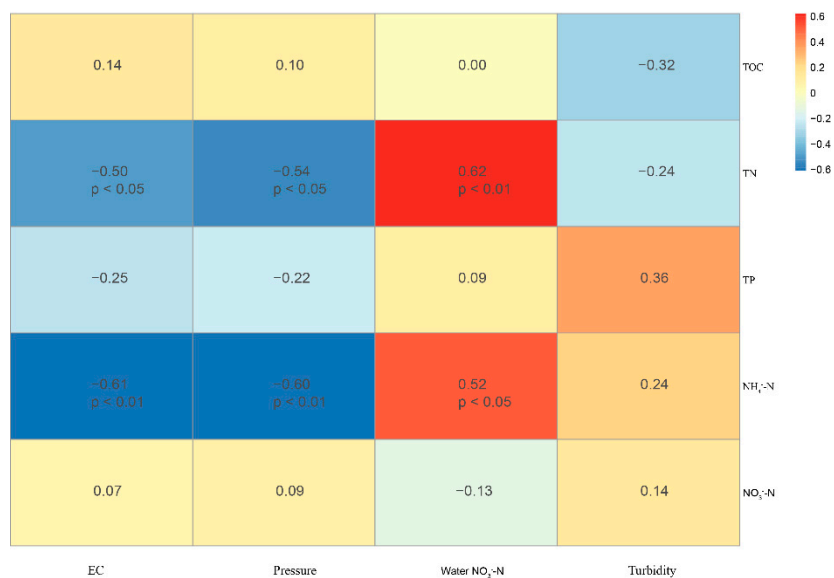

**Figure S2.** Correlations between water chemistry and sediment chemical characteristics.

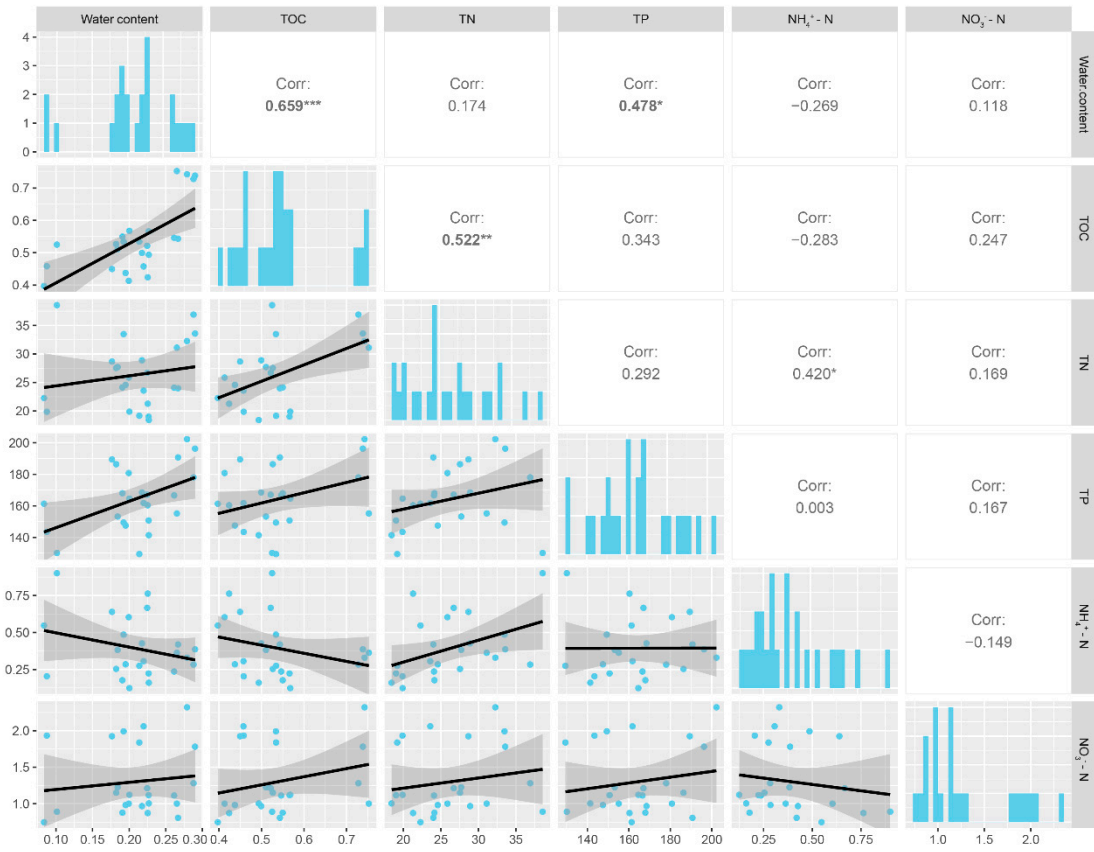

**Figure S3.** Correlation matrix of sediment physical and chemical characteristics. \* significant level < 0.05; \*\* significant level < 0.01; \*\*\* significant level < 0.001.

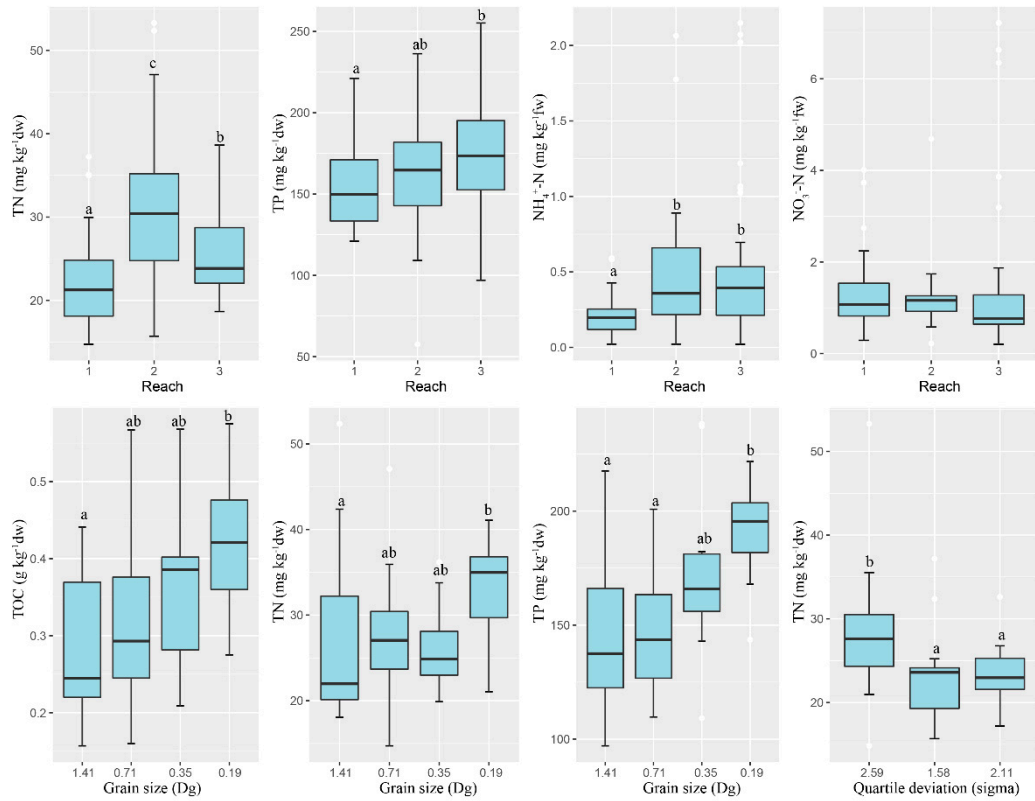

**Figure S4.** The chemical parameters of the sandy sediment with different reaches, particle median sizes, and heterogeneities. Different letters indicate significant differences ( $p < 0.05$ ).

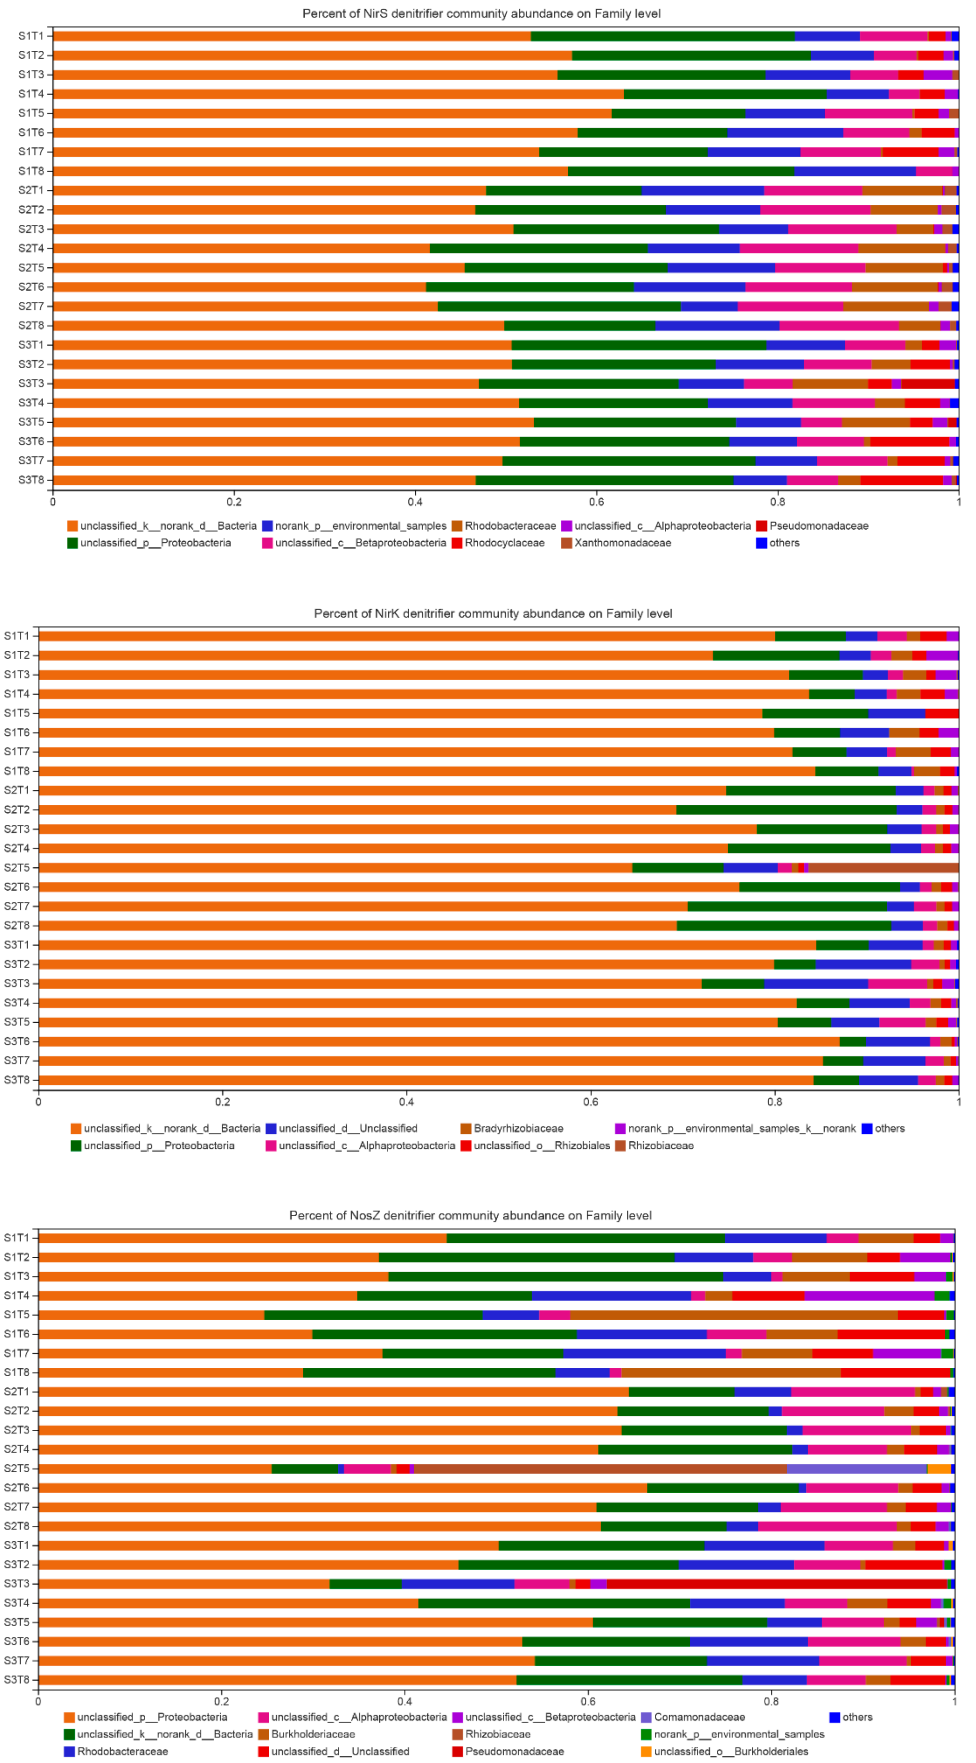

**Figure S5.** Three denitrifier community compositions (at the family level) within 24 different treatments.
